# Supplementary material for: A sensitive fluorescence method for the detection of streptavidin based on target-induced DNA machine amplification
Source: Royal Society of Chemistry journal article supplement (doi:10.1039/c8ay00293b), 2018-01-01
Supplement: c8ay00293b1.pdf [file c8ay00293b1.pdf]

## Supplementary Material

### A sensitive fluorescence method for the detection of streptavidin based on target-induced DNA machine amplification

**Mingjian Chen<sup>a</sup>, Zhiyi Deng<sup>a</sup>, Changbei Ma<sup>a,\*</sup>, Han Zhao<sup>a</sup>, Kefeng Wu<sup>a</sup>, Kemin Wang<sup>b</sup>**

<sup>a</sup> School of Life Sciences, Central South University, Changsha 410013, China

<sup>b</sup> State Key Laboratory of Chemo/Biosensing and Chemometrics, Hunan University, Changsha  
410081, China

\*Authors to whom correspondence should be addressed; E-mails: [macb2012@csu.edu.cn](mailto:macb2012@csu.edu.cn);  
Tel./Fax: +86-731-8265-0230

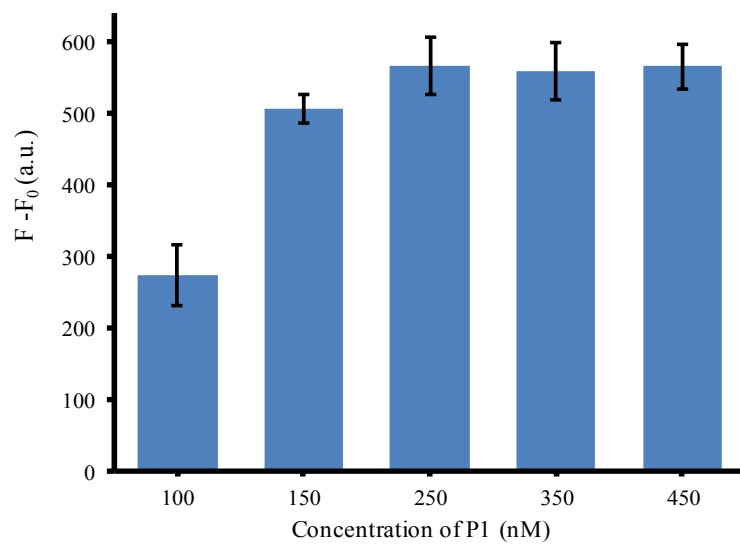

**Fig. S1** Optimization of the concentration of P1 probe (100, 150, 250, 350, 400 nM). Error bars were estimated from three replicate measurements.

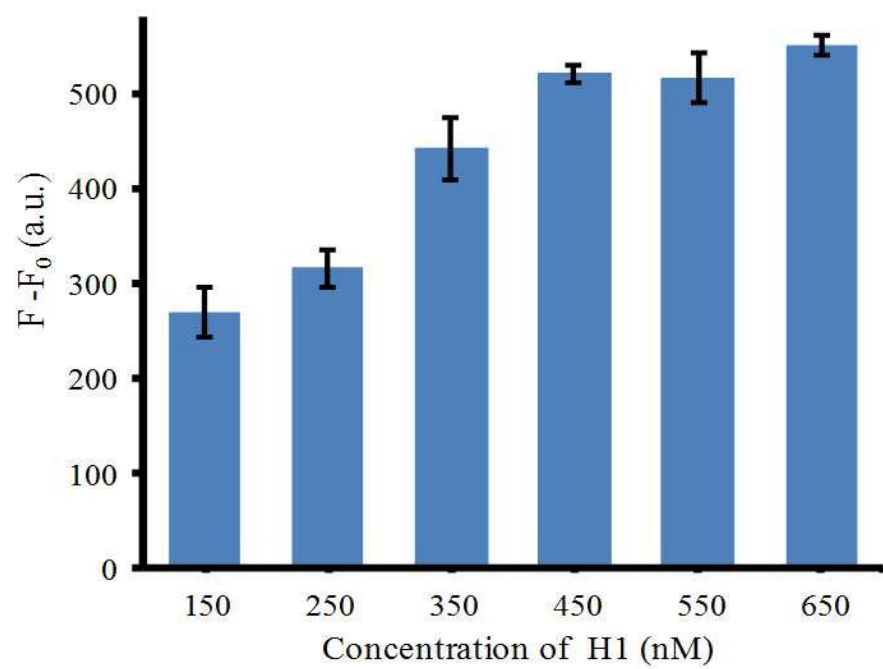

**Fig. S2** Optimization of the concentration of H1 (150, 250, 350, 450, 500, 650 nM). Error bars were estimated from three replicate measurements.

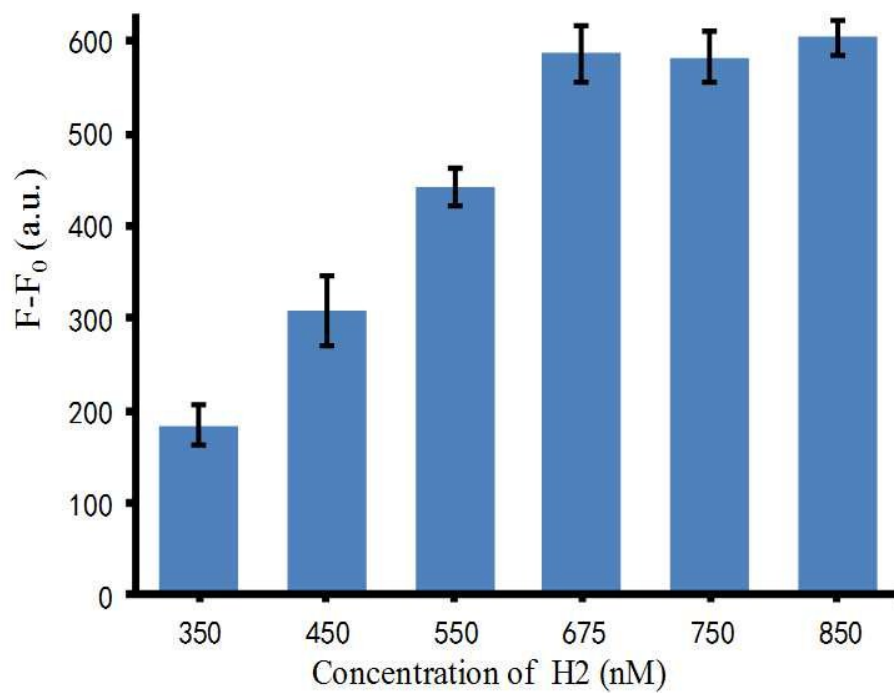

**Fig. S3** Optimization of the concentration of H<sub>2</sub> (350, 450, 550, 675, 750, 850 nM). Error bars were estimated from three replicate measurements.

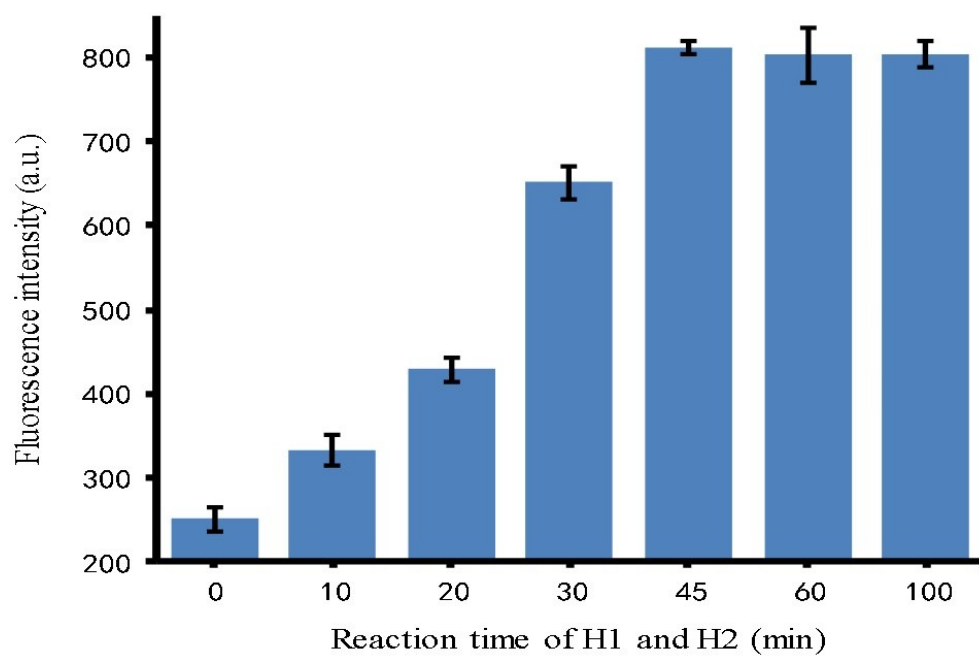

**Fig. S4** Optimization of the H1 and H2 reaction time (0, 10, 20, 30, 45, 60, 100 min). Error bars were estimated from three replicate measurements.

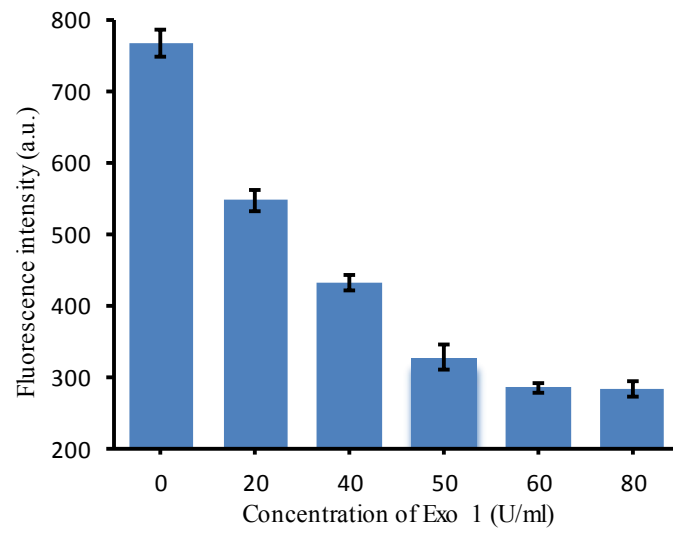

**Fig. S5** Optimization of the concentration of Exo 1 (0, 20, 40, 50, 60, 80 U/mL). Error bars were estimated from three replicate measurements.

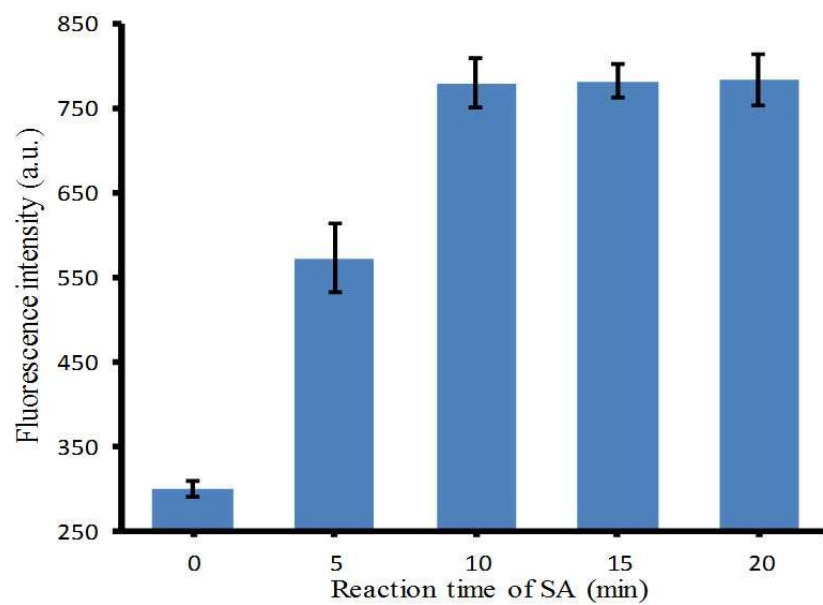

**Fig. S6** Optimization of the SA reaction time (0, 5, 10, 15, 20 min). Error bars were estimated from three replicate measurements.

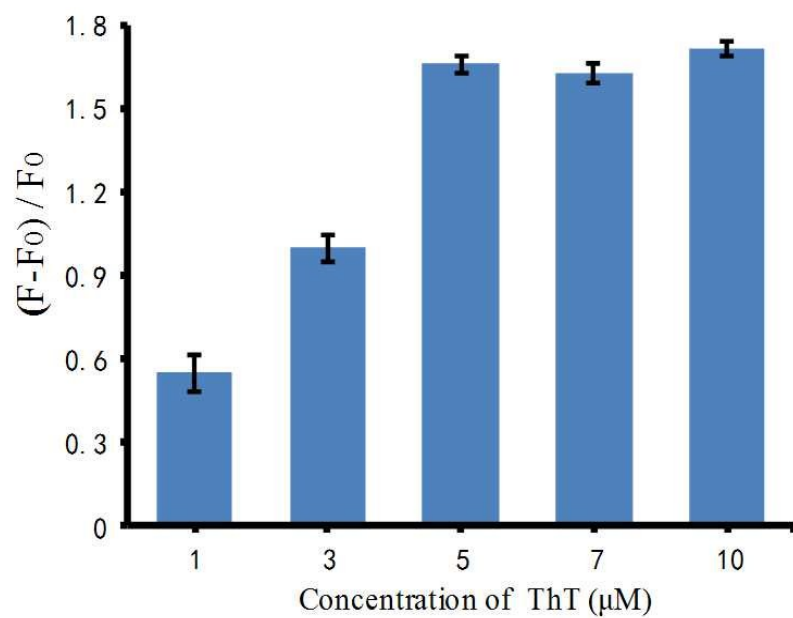

**Fig. S7** Optimization of the concentration of ThT (1, 3, 5, 7, 10  $\mu\text{M}$ ). Error bars were estimated from three replicate measurements.
